# Supplementary material
Source: publisher site journal article supplement (https://www.spandidos-publications.com/2158/downloadSupplementary)
Supplement: Supplementary file 1 [file downloadSupplementary]

## Sheet: Table SV
Table SV. miRNA/mRNA axis network regulationg diagram.
miRNA	mRNA
hsa-let-7a-2-3p	ABCD2
hsa-let-7a-2-3p	ABCD4
hsa-let-7a-2-3p	ACAA1
hsa-let-7a-2-3p	ACSL6
hsa-let-7a-2-3p	ACTB
hsa-let-7a-2-3p	ACTG1
hsa-let-7a-2-3p	ACVR2B
hsa-let-7a-2-3p	ADCY7
hsa-let-7a-2-3p	AKT3
hsa-let-7a-2-3p	ANAPC5
hsa-let-7a-2-3p	ATG101
hsa-let-7a-2-3p	ATG13
hsa-let-7a-2-3p	ATG5
hsa-let-7a-2-3p	ATP6V0A2
hsa-let-7a-2-3p	BAAT
hsa-let-7a-2-3p	BBC3
hsa-let-7a-2-3p	BCL2
hsa-let-7a-2-3p	BCL2L1
hsa-let-7a-2-3p	BCL2L11
hsa-let-7a-2-3p	BCL6
hsa-let-7a-2-3p	BIRC3
hsa-let-7a-2-3p	BNIP3
hsa-let-7a-2-3p	BUB3
hsa-let-7a-2-3p	CACNA1B
hsa-let-7a-2-3p	CACNA1C
hsa-let-7a-2-3p	CACNA1D
hsa-let-7a-2-3p	CACNA1E
hsa-let-7a-2-3p	CACNA1I
hsa-let-7a-2-3p	CACNG7
hsa-let-7a-2-3p	CALML4
hsa-let-7a-2-3p	CAMKK2
hsa-let-7a-2-3p	CASP9
hsa-let-7a-2-3p	CCNB1
hsa-let-7a-2-3p	CCND2
hsa-let-7a-2-3p	CCNE2
hsa-let-7a-2-3p	CCNG2
hsa-let-7a-2-3p	CDC23
hsa-let-7a-2-3p	CDC27
hsa-let-7a-2-3p	CDK6
hsa-let-7a-2-3p	CDKN1C
hsa-let-7a-2-3p	COX10
hsa-let-7a-2-3p	CREB1
hsa-let-7a-2-3p	CREB3L1
hsa-let-7a-2-3p	CREB3L2
hsa-let-7a-2-3p	CSF1R
hsa-let-7a-2-3p	CTSB
hsa-let-7a-2-3p	CTSK
hsa-let-7a-2-3p	CTSS
hsa-let-7a-2-3p	CTSV
hsa-let-7a-2-3p	CUL1
hsa-let-7a-2-3p	CYCS
hsa-let-7a-2-3p	DAB2IP
hsa-let-7a-2-3p	DIABLO
hsa-let-7a-2-3p	DUSP7
hsa-let-7a-2-3p	E2F5
hsa-let-7a-2-3p	EFNA5
hsa-let-7a-2-3p	EIF2S1
hsa-let-7a-2-3p	EIF4E
hsa-let-7a-2-3p	ELK4
hsa-let-7a-2-3p	ERBB4
hsa-let-7a-2-3p	EREG
hsa-let-7a-2-3p	FAR2
hsa-let-7a-2-3p	FAS
hsa-let-7a-2-3p	FGF19
hsa-let-7a-2-3p	FGF2
hsa-let-7a-2-3p	FGFR1
hsa-let-7a-2-3p	FGFR2
hsa-let-7a-2-3p	FGFR3
hsa-let-7a-2-3p	FGFR4
hsa-let-7a-2-3p	FLNA
hsa-let-7a-2-3p	FLNB
hsa-let-7a-2-3p	FLT3LG
hsa-let-7a-2-3p	FOXO1
hsa-let-7a-2-3p	FOXO3
hsa-let-7a-2-3p	G6PC
hsa-let-7a-2-3p	GSK3B
hsa-let-7a-2-3p	GSTM1
hsa-let-7a-2-3p	GSTM2
hsa-let-7a-2-3p	GSTM4
hsa-let-7a-2-3p	HGF
hsa-let-7a-2-3p	HOMER1
hsa-let-7a-2-3p	HOMER3
hsa-let-7a-2-3p	HRAS
hsa-let-7a-2-3p	ICAM1
hsa-let-7a-2-3p	IGF1R
hsa-let-7a-2-3p	IL1RAP
hsa-let-7a-2-3p	INSR
hsa-let-7a-2-3p	IRAK1
hsa-let-7a-2-3p	IRS2
hsa-let-7a-2-3p	ITGAV
hsa-let-7a-2-3p	KEAP1
hsa-let-7a-2-3p	KITLG
hsa-let-7a-2-3p	KLF2
hsa-let-7a-2-3p	KRAS
hsa-let-7a-2-3p	MAP2K4
hsa-let-7a-2-3p	MAP3K2
hsa-let-7a-2-3p	MAP3K4
hsa-let-7a-2-3p	MAP3K8
hsa-let-7a-2-3p	MAP4K3
hsa-let-7a-2-3p	MAPK14
hsa-let-7a-2-3p	MAPK8IP3
hsa-let-7a-2-3p	MAPK9
hsa-let-7a-2-3p	MCL1
hsa-let-7a-2-3p	MEF2A
hsa-let-7a-2-3p	MKNK2
hsa-let-7a-2-3p	MLYCD
hsa-let-7a-2-3p	NCF1
hsa-let-7a-2-3p	NCF2
hsa-let-7a-2-3p	NDUFA5
hsa-let-7a-2-3p	NDUFA9
hsa-let-7a-2-3p	NDUFB2
hsa-let-7a-2-3p	NFATC1
hsa-let-7a-2-3p	NFKB2
hsa-let-7a-2-3p	NLK
hsa-let-7a-2-3p	NTRK2
hsa-let-7a-2-3p	ODC1
hsa-let-7a-2-3p	ORC2
hsa-let-7a-2-3p	ORC4
hsa-let-7a-2-3p	PARP2
hsa-let-7a-2-3p	PARP3
hsa-let-7a-2-3p	PDGFC
hsa-let-7a-2-3p	PDGFRA
hsa-let-7a-2-3p	PEX11B
hsa-let-7a-2-3p	PEX14
hsa-let-7a-2-3p	PEX19
hsa-let-7a-2-3p	PEX5
hsa-let-7a-2-3p	PIK3R1
hsa-let-7a-2-3p	PLA2G4F
hsa-let-7a-2-3p	PLK1
hsa-let-7a-2-3p	PPARGC1A
hsa-let-7a-2-3p	PPM1A
hsa-let-7a-2-3p	PPM1B
hsa-let-7a-2-3p	PPP3R1
hsa-let-7a-2-3p	PRKAA1
hsa-let-7a-2-3p	PRKAA2
hsa-let-7a-2-3p	PRKAB1
hsa-let-7a-2-3p	PRKAB2
hsa-let-7a-2-3p	PRKACB
hsa-let-7a-2-3p	PTEN
hsa-let-7a-2-3p	PTK2
hsa-let-7a-2-3p	PTPN5
hsa-let-7a-2-3p	PXMP4
hsa-let-7a-2-3p	RAC1
hsa-let-7a-2-3p	RAD21
hsa-let-7a-2-3p	RASGRF1
hsa-let-7a-2-3p	RASGRP2
hsa-let-7a-2-3p	RB1
hsa-let-7a-2-3p	RB1CC1
hsa-let-7a-2-3p	RPS6KA2
hsa-let-7a-2-3p	RPS6KA6
hsa-let-7a-2-3p	RPTOR
hsa-let-7a-2-3p	RRM2B
hsa-let-7a-2-3p	S1PR1
hsa-let-7a-2-3p	SDC1
hsa-let-7a-2-3p	SGK1
hsa-let-7a-2-3p	SMAD2
hsa-let-7a-2-3p	SMAD3
hsa-let-7a-2-3p	SMAD4
hsa-let-7a-2-3p	SMC1A
hsa-let-7a-2-3p	SMC3
hsa-let-7a-2-3p	SMS
hsa-let-7a-2-3p	SOS1
hsa-let-7a-2-3p	STAG1
hsa-let-7a-2-3p	STAG2
hsa-let-7a-2-3p	STK4
hsa-let-7a-2-3p	STMN1
hsa-let-7a-2-3p	SUMO1
hsa-let-7a-2-3p	TAB2
hsa-let-7a-2-3p	TAOK1
hsa-let-7a-2-3p	TEK
hsa-let-7a-2-3p	TNFRSF10B
hsa-let-7a-2-3p	TRAF2
hsa-let-7a-2-3p	TRAF6
hsa-let-7a-2-3p	TSC1
hsa-let-7a-2-3p	WEE1
hsa-let-7a-2-3p	WEE2
hsa-let-7a-2-3p	XIAP
hsa-let-7a-2-3p	YWHAE
hsa-let-7a-2-3p	ZAK
hsa-miR-1237-3p	ABCD4
hsa-miR-1237-3p	ACAA1
hsa-miR-1237-3p	ACSL6
hsa-miR-1237-3p	ACTG1
hsa-miR-1237-3p	ACVR2B
hsa-miR-1237-3p	ADCY1
hsa-miR-1237-3p	ADCY2
hsa-miR-1237-3p	ADCY5
hsa-miR-1237-3p	ADCY6
hsa-miR-1237-3p	AGAP2
hsa-miR-1237-3p	AGPS
hsa-miR-1237-3p	AIFM1
hsa-miR-1237-3p	AKT2
hsa-miR-1237-3p	AKT3
hsa-miR-1237-3p	AMACR
hsa-miR-1237-3p	ANAPC7
hsa-miR-1237-3p	ANGPT4
hsa-miR-1237-3p	APAF1
hsa-miR-1237-3p	APPL1
hsa-miR-1237-3p	ARRB1
hsa-miR-1237-3p	ATG12
hsa-miR-1237-3p	ATG13
hsa-miR-1237-3p	ATG5
hsa-miR-1237-3p	ATP5I
hsa-miR-1237-3p	ATP6V0A2
hsa-miR-1237-3p	ATP6V1B2
hsa-miR-1237-3p	ATP6V1C1
hsa-miR-1237-3p	ATP6V1C2
hsa-miR-1237-3p	ATP6V1E1
hsa-miR-1237-3p	BBC3
hsa-miR-1237-3p	BCL2
hsa-miR-1237-3p	BCL2L1
hsa-miR-1237-3p	BCL6
hsa-miR-1237-3p	BDNF
hsa-miR-1237-3p	BIRC3
hsa-miR-1237-3p	BMPR1B
hsa-miR-1237-3p	BUB3
hsa-miR-1237-3p	C8orf44-SGK3
hsa-miR-1237-3p	CACNA1A
hsa-miR-1237-3p	CACNA1B
hsa-miR-1237-3p	CACNA1C
hsa-miR-1237-3p	CACNA1E
hsa-miR-1237-3p	CACNA1G
hsa-miR-1237-3p	CACNA1I
hsa-miR-1237-3p	CACNB2
hsa-miR-1237-3p	CACNB4
hsa-miR-1237-3p	CACNG2
hsa-miR-1237-3p	CACNG4
hsa-miR-1237-3p	CACNG8
hsa-miR-1237-3p	CALM3
hsa-miR-1237-3p	CALML4
hsa-miR-1237-3p	CALML5
hsa-miR-1237-3p	CASP10
hsa-miR-1237-3p	CASP6
hsa-miR-1237-3p	CCNA2
hsa-miR-1237-3p	CCND1
hsa-miR-1237-3p	CCND2
hsa-miR-1237-3p	CCNG2
hsa-miR-1237-3p	CDC27
hsa-miR-1237-3p	CDH5
hsa-miR-1237-3p	CDK4
hsa-miR-1237-3p	CDK6
hsa-miR-1237-3p	CFLAR
hsa-miR-1237-3p	COX11
hsa-miR-1237-3p	CREB3L2
hsa-miR-1237-3p	CREB3L3
hsa-miR-1237-3p	CREB5
hsa-miR-1237-3p	CRK
hsa-miR-1237-3p	CRKL
hsa-miR-1237-3p	CSF1
hsa-miR-1237-3p	CSNK1E
hsa-miR-1237-3p	CTSD
hsa-miR-1237-3p	CTSF
hsa-miR-1237-3p	CTSH
hsa-miR-1237-3p	DAB2IP
hsa-miR-1237-3p	DDO
hsa-miR-1237-3p	DFFA
hsa-miR-1237-3p	DUSP1
hsa-miR-1237-3p	DUSP3
hsa-miR-1237-3p	DUSP4
hsa-miR-1237-3p	DUSP7
hsa-miR-1237-3p	DUSP8
hsa-miR-1237-3p	DUSP9
hsa-miR-1237-3p	E2F1
hsa-miR-1237-3p	ECI2
hsa-miR-1237-3p	EFNA2
hsa-miR-1237-3p	EFNA4
hsa-miR-1237-3p	EFNA5
hsa-miR-1237-3p	EGFR
hsa-miR-1237-3p	EHHADH
hsa-miR-1237-3p	EIF2S1
hsa-miR-1237-3p	EIF4E2
hsa-miR-1237-3p	EPHA2
hsa-miR-1237-3p	ERBB2
hsa-miR-1237-3p	ERBB3
hsa-miR-1237-3p	ERBB4
hsa-miR-1237-3p	ERN1
hsa-miR-1237-3p	FADD
hsa-miR-1237-3p	FAR1
hsa-miR-1237-3p	FAS
hsa-miR-1237-3p	FBXO32
hsa-miR-1237-3p	FGF1
hsa-miR-1237-3p	FGF2
hsa-miR-1237-3p	FGF9
hsa-miR-1237-3p	FGFR2
hsa-miR-1237-3p	FLT3
hsa-miR-1237-3p	FLT4
hsa-miR-1237-3p	FOXG1
hsa-miR-1237-3p	G6PC
hsa-miR-1237-3p	G6PD
hsa-miR-1237-3p	GABARAPL1
hsa-miR-1237-3p	GADD45B
hsa-miR-1237-3p	GGT5
hsa-miR-1237-3p	GGT6
hsa-miR-1237-3p	GNA12
hsa-miR-1237-3p	GPX2
hsa-miR-1237-3p	GPX8
hsa-miR-1237-3p	GRB2
hsa-miR-1237-3p	GSR
hsa-miR-1237-3p	GSTM3
hsa-miR-1237-3p	GSTP1
hsa-miR-1237-3p	HGF
hsa-miR-1237-3p	HMGCL
hsa-miR-1237-3p	HMGCLL1
hsa-miR-1237-3p	HOMER3
hsa-miR-1237-3p	HRAS
hsa-miR-1237-3p	HTRA2
hsa-miR-1237-3p	ICAM1
hsa-miR-1237-3p	IDH2
hsa-miR-1237-3p	IGF1
hsa-miR-1237-3p	IGF1R
hsa-miR-1237-3p	IRAK1
hsa-miR-1237-3p	IRS1
hsa-miR-1237-3p	JUN
hsa-miR-1237-3p	LOC400927-CSNK1E
hsa-miR-1237-3p	MAP2K4
hsa-miR-1237-3p	MAP2K7
hsa-miR-1237-3p	MAP3K13
hsa-miR-1237-3p	MAP3K14
hsa-miR-1237-3p	MAP3K3
hsa-miR-1237-3p	MAP3K7
hsa-miR-1237-3p	MAP3K8
hsa-miR-1237-3p	MAPK10
hsa-miR-1237-3p	MAPK11
hsa-miR-1237-3p	MAPK12
hsa-miR-1237-3p	MAPK13
hsa-miR-1237-3p	MAPK8
hsa-miR-1237-3p	MAPT
hsa-miR-1237-3p	MKNK2
hsa-miR-1237-3p	MMP2
hsa-miR-1237-3p	MPV17L
hsa-miR-1237-3p	MPV17L2
hsa-miR-1237-3p	MRAS
hsa-miR-1237-3p	MVK
hsa-miR-1237-3p	NDUFS2
hsa-miR-1237-3p	NF1
hsa-miR-1237-3p	NFATC1
hsa-miR-1237-3p	NFATC3
hsa-miR-1237-3p	NGFR
hsa-miR-1237-3p	NQO1
hsa-miR-1237-3p	NTRK2
hsa-miR-1237-3p	ORC2
hsa-miR-1237-3p	ORC5
hsa-miR-1237-3p	PAK2
hsa-miR-1237-3p	PCK2
hsa-miR-1237-3p	PDGFRA
hsa-miR-1237-3p	PDPK1
hsa-miR-1237-3p	PECR
hsa-miR-1237-3p	PEX11A
hsa-miR-1237-3p	PEX26
hsa-miR-1237-3p	PEX5
hsa-miR-1237-3p	PEX5L
hsa-miR-1237-3p	PGF
hsa-miR-1237-3p	PIAS4
hsa-miR-1237-3p	PIPOX
hsa-miR-1237-3p	PLA2G4E
hsa-miR-1237-3p	PLA2G4F
hsa-miR-1237-3p	PLAT
hsa-miR-1237-3p	PPA2
hsa-miR-1237-3p	PPM1B
hsa-miR-1237-3p	PPP5C
hsa-miR-1237-3p	PRF1
hsa-miR-1237-3p	PRKAA2
hsa-miR-1237-3p	PRKAB2
hsa-miR-1237-3p	PRKCA
hsa-miR-1237-3p	PRKCB
hsa-miR-1237-3p	PRKDC
hsa-miR-1237-3p	PRMT1
hsa-miR-1237-3p	PTPN5
hsa-miR-1237-3p	PTPN7
hsa-miR-1237-3p	PTPRR
hsa-miR-1237-3p	PXMP4
hsa-miR-1237-3p	RASA2
hsa-miR-1237-3p	RASGRF2
hsa-miR-1237-3p	RASGRP2
hsa-miR-1237-3p	RASGRP3
hsa-miR-1237-3p	RBL1
hsa-miR-1237-3p	RELA
hsa-miR-1237-3p	RPS6KA2
hsa-miR-1237-3p	RPS6KA4
hsa-miR-1237-3p	RPS6KA6
hsa-miR-1237-3p	RRM2
hsa-miR-1237-3p	SEPT4
hsa-miR-1237-3p	SESN3
hsa-miR-1237-3p	SETD7
hsa-miR-1237-3p	SGK3
hsa-miR-1237-3p	SMAD2
hsa-miR-1237-3p	SMAD3
hsa-miR-1237-3p	SMAD4
hsa-miR-1237-3p	SMC1A
hsa-miR-1237-3p	SOS1
hsa-miR-1237-3p	SRF
hsa-miR-1237-3p	STAG2
hsa-miR-1237-3p	STAT3
hsa-miR-1237-3p	STMN1
hsa-miR-1237-3p	TAB1
hsa-miR-1237-3p	TAOK1
hsa-miR-1237-3p	TGFA
hsa-miR-1237-3p	TGFB3
hsa-miR-1237-3p	TGFBR1
hsa-miR-1237-3p	THBD
hsa-miR-1237-3p	TNFRSF10B
hsa-miR-1237-3p	TP53
hsa-miR-1237-3p	TRAF1
hsa-miR-1237-3p	TSC1
hsa-miR-1237-3p	UQCR10
hsa-miR-1237-3p	UQCRB
hsa-miR-1237-3p	VEGFA
hsa-miR-1237-3p	XDH
hsa-miR-1237-3p	XIAP
hsa-miR-1237-3p	YWHAB
hsa-miR-1237-3p	ZAK
hsa-miR-1261	ABCD2
hsa-miR-1261	ACSL6
hsa-miR-1261	ACVR1
hsa-miR-1261	ACVR2A
hsa-miR-1261	ACVR2B
hsa-miR-1261	ADCY1
hsa-miR-1261	ADCY3
hsa-miR-1261	ADCY9
hsa-miR-1261	ADIPOQ
hsa-miR-1261	AGAP2
hsa-miR-1261	AKT3
hsa-miR-1261	AMACR
hsa-miR-1261	ANAPC11
hsa-miR-1261	ANGPT2
hsa-miR-1261	ARAF
hsa-miR-1261	ATF2
hsa-miR-1261	ATG5
hsa-miR-1261	ATM
hsa-miR-1261	ATP6V0B
hsa-miR-1261	ATP6V0D2
hsa-miR-1261	ATP6V1G1
hsa-miR-1261	BMPR2
hsa-miR-1261	CACNA1C
hsa-miR-1261	CACNA2D1
hsa-miR-1261	CALM2
hsa-miR-1261	CALML4
hsa-miR-1261	CASP10
hsa-miR-1261	CASP2
hsa-miR-1261	CASP7
hsa-miR-1261	CASP9
hsa-miR-1261	CAV1
hsa-miR-1261	CDC14A
hsa-miR-1261	CDC27
hsa-miR-1261	CDKN1B
hsa-miR-1261	CHEK1
hsa-miR-1261	COX6B2
hsa-miR-1261	CREB1
hsa-miR-1261	CSF2RB
hsa-miR-1261	CTSC
hsa-miR-1261	CTSO
hsa-miR-1261	CTSS
hsa-miR-1261	DAB2IP
hsa-miR-1261	DUSP3
hsa-miR-1261	DUSP6
hsa-miR-1261	ECH1
hsa-miR-1261	ECI2
hsa-miR-1261	EGF
hsa-miR-1261	EIF2S1
hsa-miR-1261	ERBB4
hsa-miR-1261	FAS
hsa-miR-1261	FGF1
hsa-miR-1261	FGF2
hsa-miR-1261	FGF5
hsa-miR-1261	FGFR1
hsa-miR-1261	FLT1
hsa-miR-1261	FOXO3
hsa-miR-1261	G6PC2
hsa-miR-1261	GABARAPL2
hsa-miR-1261	GCLC
hsa-miR-1261	GSK3B
hsa-miR-1261	GSR
hsa-miR-1261	HDAC2
hsa-miR-1261	HMGCLL1
hsa-miR-1261	HOMER1
hsa-miR-1261	IGF1
hsa-miR-1261	IGF1R
hsa-miR-1261	IL1RAP
hsa-miR-1261	IL7R
hsa-miR-1261	IRS1
hsa-miR-1261	KDR
hsa-miR-1261	LAMTOR3
hsa-miR-1261	MAP3K14
hsa-miR-1261	MAP3K3
hsa-miR-1261	MAP4K4
hsa-miR-1261	MAPK1
hsa-miR-1261	MAPK8IP2
hsa-miR-1261	MCM2
hsa-miR-1261	MEF2C
hsa-miR-1261	MGST1
hsa-miR-1261	MRAS
hsa-miR-1261	MYD88
hsa-miR-1261	NDUFA5
hsa-miR-1261	NDUFB4
hsa-miR-1261	NDUFS3
hsa-miR-1261	NDUFV3
hsa-miR-1261	NF1
hsa-miR-1261	NFKB1
hsa-miR-1261	NOX1
hsa-miR-1261	NTRK2
hsa-miR-1261	NUDT19
hsa-miR-1261	ORC3
hsa-miR-1261	ORC4
hsa-miR-1261	PDGFC
hsa-miR-1261	PDGFD
hsa-miR-1261	PDGFRA
hsa-miR-1261	PDGFRB
hsa-miR-1261	PDPK1
hsa-miR-1261	PEX11A
hsa-miR-1261	PEX11B
hsa-miR-1261	PIK3R1
hsa-miR-1261	PLA2G4F
hsa-miR-1261	PPA1
hsa-miR-1261	PPM1A
hsa-miR-1261	PRKAA2
hsa-miR-1261	PRKAB1
hsa-miR-1261	PRKAB2
hsa-miR-1261	PRKCA
hsa-miR-1261	PRKCB
hsa-miR-1261	PTK2
hsa-miR-1261	RAP1A
hsa-miR-1261	RASA1
hsa-miR-1261	RASGRP1
hsa-miR-1261	RBL1
hsa-miR-1261	RELA
hsa-miR-1261	RPS6KA2
hsa-miR-1261	RPS6KA6
hsa-miR-1261	SELE
hsa-miR-1261	SESN3
hsa-miR-1261	SETD7
hsa-miR-1261	SMAD4
hsa-miR-1261	SMC1A
hsa-miR-1261	SUMO4
hsa-miR-1261	TAB1
hsa-miR-1261	TAOK1
hsa-miR-1261	TFDP2
hsa-miR-1261	TGFBR1
hsa-miR-1261	THBD
hsa-miR-1261	TRAF6
hsa-miR-1261	TSC1
hsa-miR-1261	TUBA1B
hsa-miR-1261	XIAP
hsa-miR-1261	YWHAG
hsa-miR-1273h-3p	ABCD3
hsa-miR-1273h-3p	ABL1
hsa-miR-1273h-3p	ACAA1
hsa-miR-1273h-3p	ACVR2B
hsa-miR-1273h-3p	ADCY1
hsa-miR-1273h-3p	ADCY9
hsa-miR-1273h-3p	AIFM1
hsa-miR-1273h-3p	AKT2
hsa-miR-1273h-3p	ANAPC1
hsa-miR-1273h-3p	ANGPT2
hsa-miR-1273h-3p	APAF1
hsa-miR-1273h-3p	ARRB1
hsa-miR-1273h-3p	ATP5G3
hsa-miR-1273h-3p	ATP5I
hsa-miR-1273h-3p	ATP6V0A1
hsa-miR-1273h-3p	ATP6V1A
hsa-miR-1273h-3p	ATP6V1G1
hsa-miR-1273h-3p	BCL2
hsa-miR-1273h-3p	BCL6
hsa-miR-1273h-3p	BDNF
hsa-miR-1273h-3p	BMPR1B
hsa-miR-1273h-3p	CACNA1B
hsa-miR-1273h-3p	CACNA1C
hsa-miR-1273h-3p	CACNA1E
hsa-miR-1273h-3p	CACNA1I
hsa-miR-1273h-3p	CACNA2D2
hsa-miR-1273h-3p	CACNG2
hsa-miR-1273h-3p	CACNG7
hsa-miR-1273h-3p	CACNG8
hsa-miR-1273h-3p	CALM1
hsa-miR-1273h-3p	CAMKK2
hsa-miR-1273h-3p	CAPN1
hsa-miR-1273h-3p	CASP7
hsa-miR-1273h-3p	CASP8
hsa-miR-1273h-3p	CCND3
hsa-miR-1273h-3p	CCNG2
hsa-miR-1273h-3p	CDC14B
hsa-miR-1273h-3p	CDK6
hsa-miR-1273h-3p	CFLAR
hsa-miR-1273h-3p	CHUK
hsa-miR-1273h-3p	COX10
hsa-miR-1273h-3p	CREB1
hsa-miR-1273h-3p	CREB3L2
hsa-miR-1273h-3p	CREB3L4
hsa-miR-1273h-3p	CREBBP
hsa-miR-1273h-3p	CRK
hsa-miR-1273h-3p	CROT
hsa-miR-1273h-3p	CSF1
hsa-miR-1273h-3p	CTSB
hsa-miR-1273h-3p	CYCS
hsa-miR-1273h-3p	E2F2
hsa-miR-1273h-3p	EHMT1
hsa-miR-1273h-3p	EIF4E2
hsa-miR-1273h-3p	ERN1
hsa-miR-1273h-3p	FBXO32
hsa-miR-1273h-3p	FGF1
hsa-miR-1273h-3p	FGF9
hsa-miR-1273h-3p	FGFR1
hsa-miR-1273h-3p	FGFR2
hsa-miR-1273h-3p	FLT1
hsa-miR-1273h-3p	FLT3
hsa-miR-1273h-3p	FZR1
hsa-miR-1273h-3p	G6PC2
hsa-miR-1273h-3p	GADD45B
hsa-miR-1273h-3p	GCLM
hsa-miR-1273h-3p	GNA12
hsa-miR-1273h-3p	GNG12
hsa-miR-1273h-3p	GPC1
hsa-miR-1273h-3p	GSK3B
hsa-miR-1273h-3p	GSTM1
hsa-miR-1273h-3p	GSTM2
hsa-miR-1273h-3p	HDAC2
hsa-miR-1273h-3p	HMGCLL1
hsa-miR-1273h-3p	IGF2
hsa-miR-1273h-3p	IKBKB
hsa-miR-1273h-3p	IKBKG
hsa-miR-1273h-3p	IL1R1
hsa-miR-1273h-3p	IL7R
hsa-miR-1273h-3p	INSR
hsa-miR-1273h-3p	IRAK1
hsa-miR-1273h-3p	IRS1
hsa-miR-1273h-3p	ITPR2
hsa-miR-1273h-3p	JMJD7-PLA2G4B
hsa-miR-1273h-3p	LMNB2
hsa-miR-1273h-3p	MAP2K4
hsa-miR-1273h-3p	MAP2K7
hsa-miR-1273h-3p	MAP3K8
hsa-miR-1273h-3p	MAP4K4
hsa-miR-1273h-3p	MAPK10
hsa-miR-1273h-3p	MAPK13
hsa-miR-1273h-3p	MAPKAPK2
hsa-miR-1273h-3p	MAPKAPK3
hsa-miR-1273h-3p	MCM4
hsa-miR-1273h-3p	MECOM
hsa-miR-1273h-3p	MEF2A
hsa-miR-1273h-3p	MEF2C
hsa-miR-1273h-3p	MGST3
hsa-miR-1273h-3p	MKNK1
hsa-miR-1273h-3p	MVK
hsa-miR-1273h-3p	MYD88
hsa-miR-1273h-3p	NDUFA10
hsa-miR-1273h-3p	NDUFA11
hsa-miR-1273h-3p	NFATC1
hsa-miR-1273h-3p	NGFR
hsa-miR-1273h-3p	ORC4
hsa-miR-1273h-3p	PAK2
hsa-miR-1273h-3p	PDGFRA
hsa-miR-1273h-3p	PEX13
hsa-miR-1273h-3p	PEX19
hsa-miR-1273h-3p	PEX26
hsa-miR-1273h-3p	PLA2G4E
hsa-miR-1273h-3p	PLA2G4F
hsa-miR-1273h-3p	PLK1
hsa-miR-1273h-3p	PPP3CC
hsa-miR-1273h-3p	PRKAA2
hsa-miR-1273h-3p	PRKDC
hsa-miR-1273h-3p	PXMP4
hsa-miR-1273h-3p	RAPGEF2
hsa-miR-1273h-3p	RASA2
hsa-miR-1273h-3p	RASGRF1
hsa-miR-1273h-3p	RASGRF2
hsa-miR-1273h-3p	RASGRP3
hsa-miR-1273h-3p	RBL1
hsa-miR-1273h-3p	RIPK1
hsa-miR-1273h-3p	SDC2
hsa-miR-1273h-3p	SESN3
hsa-miR-1273h-3p	SLC25A17
hsa-miR-1273h-3p	SQSTM1
hsa-miR-1273h-3p	SRC
hsa-miR-1273h-3p	SRF
hsa-miR-1273h-3p	TAB1
hsa-miR-1273h-3p	TAB2
hsa-miR-1273h-3p	TAOK1
hsa-miR-1273h-3p	TGFB1
hsa-miR-1273h-3p	TGFB2
hsa-miR-1273h-3p	TGFBR1
hsa-miR-1273h-3p	THBD
hsa-miR-1273h-3p	TNF
hsa-miR-1273h-3p	TRAF2
hsa-miR-1273h-3p	TRAF6
hsa-miR-1273h-3p	TSC1
hsa-miR-1273h-3p	TXN2
hsa-miR-1273h-3p	TXNDC12
hsa-miR-1273h-3p	UQCRB
hsa-miR-1273h-3p	UQCRQ
hsa-miR-1273h-3p	USP7
hsa-miR-1273h-3p	VEGFB
hsa-miR-1273h-3p	WEE1
hsa-miR-1273h-3p	XDH
hsa-miR-1273h-3p	XIAP
hsa-miR-1273h-3p	ZAK
hsa-miR-1298-5p	ACOX1
hsa-miR-1298-5p	ADCY2
hsa-miR-1298-5p	AKT2
hsa-miR-1298-5p	AKT3
hsa-miR-1298-5p	ANAPC7
hsa-miR-1298-5p	ATP5F1
hsa-miR-1298-5p	ATP5I
hsa-miR-1298-5p	ATP6V0C
hsa-miR-1298-5p	ATP6V1C1
hsa-miR-1298-5p	BDNF
hsa-miR-1298-5p	BID
hsa-miR-1298-5p	CACNA1B
hsa-miR-1298-5p	CALML3
hsa-miR-1298-5p	CASP6
hsa-miR-1298-5p	CAV1
hsa-miR-1298-5p	CDC14B
hsa-miR-1298-5p	CDKN1A
hsa-miR-1298-5p	CFLAR
hsa-miR-1298-5p	CSF1R
hsa-miR-1298-5p	CTSV
hsa-miR-1298-5p	DUSP10
hsa-miR-1298-5p	DUSP16
hsa-miR-1298-5p	EDN1
hsa-miR-1298-5p	EGFR
hsa-miR-1298-5p	EIF4EBP1
hsa-miR-1298-5p	ELK4
hsa-miR-1298-5p	ERBB4
hsa-miR-1298-5p	ERN1
hsa-miR-1298-5p	FGFR2
hsa-miR-1298-5p	GADD45A
hsa-miR-1298-5p	GNA12
hsa-miR-1298-5p	HACL1
hsa-miR-1298-5p	HGF
hsa-miR-1298-5p	IGF1R
hsa-miR-1298-5p	IL1RAP
hsa-miR-1298-5p	KL
hsa-miR-1298-5p	MAP3K12
hsa-miR-1298-5p	MAP3K13
hsa-miR-1298-5p	MAP3K2
hsa-miR-1298-5p	MAP3K7
hsa-miR-1298-5p	MAPK13
hsa-miR-1298-5p	NDUFA2
hsa-miR-1298-5p	NTRK2
hsa-miR-1298-5p	PAK1
hsa-miR-1298-5p	PAK2
hsa-miR-1298-5p	PCK2
hsa-miR-1298-5p	PDGFRA
hsa-miR-1298-5p	PPM1A
hsa-miR-1298-5p	PRKAB2
hsa-miR-1298-5p	PTEN
hsa-miR-1298-5p	PTPN7
hsa-miR-1298-5p	PXMP4
hsa-miR-1298-5p	RAC1
hsa-miR-1298-5p	RASA2
hsa-miR-1298-5p	RASGRF2
hsa-miR-1298-5p	RPS6KA2
hsa-miR-1298-5p	SELE
hsa-miR-1298-5p	SEPT4
hsa-miR-1298-5p	SESN3
hsa-miR-1298-5p	SETD7
hsa-miR-1298-5p	SMAD2
hsa-miR-1298-5p	SMAD3
hsa-miR-1298-5p	SMAD4
hsa-miR-1298-5p	SMC1A
hsa-miR-1298-5p	STK3
hsa-miR-1298-5p	TFDP2
hsa-miR-1298-5p	TGFBR1
hsa-miR-1298-5p	TNFRSF10B
hsa-miR-1298-5p	TP53
hsa-miR-1298-5p	TRAF1
hsa-miR-1298-5p	TSC1
hsa-miR-1298-5p	YWHAE
hsa-miR-132-5p	ACVR1
hsa-miR-132-5p	ADCY1
hsa-miR-132-5p	ANGPT2
hsa-miR-132-5p	ATP6V0A2
hsa-miR-132-5p	ATP6V1C1
hsa-miR-132-5p	BAD
hsa-miR-132-5p	BCL2
hsa-miR-132-5p	BID
hsa-miR-132-5p	BIRC5
hsa-miR-132-5p	BMPR2
hsa-miR-132-5p	CACNA1A
hsa-miR-132-5p	CACNA2D4
hsa-miR-132-5p	CACNG2
hsa-miR-132-5p	CACNG7
hsa-miR-132-5p	CALML4
hsa-miR-132-5p	CAMKK2
hsa-miR-132-5p	CASP12
hsa-miR-132-5p	CASP6
hsa-miR-132-5p	CCNE1
hsa-miR-132-5p	CDKN2A
hsa-miR-132-5p	CDKN2B
hsa-miR-132-5p	CFLAR
hsa-miR-132-5p	CRAT
hsa-miR-132-5p	CREB3L3
hsa-miR-132-5p	CREB5
hsa-miR-132-5p	CSF1R
hsa-miR-132-5p	CSNK1E
hsa-miR-132-5p	DAB2IP
hsa-miR-132-5p	DFFA
hsa-miR-132-5p	DUSP1
hsa-miR-132-5p	DUSP16
hsa-miR-132-5p	DUSP4
hsa-miR-132-5p	DUSP7
hsa-miR-132-5p	E2F1
hsa-miR-132-5p	FGF5
hsa-miR-132-5p	FGFR1
hsa-miR-132-5p	FGFR2
hsa-miR-132-5p	FLT1
hsa-miR-132-5p	FLT3
hsa-miR-132-5p	G6PD
hsa-miR-132-5p	GPX3
hsa-miR-132-5p	GRB2
hsa-miR-132-5p	GSS
hsa-miR-132-5p	HRK
hsa-miR-132-5p	ICAM1
hsa-miR-132-5p	IGF1R
hsa-miR-132-5p	IRAK4
hsa-miR-132-5p	IRS1
hsa-miR-132-5p	ITGB3
hsa-miR-132-5p	LOC400927-CSNK1E
hsa-miR-132-5p	MAP2K6
hsa-miR-132-5p	MAPKAPK3
hsa-miR-132-5p	MAPT
hsa-miR-132-5p	MCM5
hsa-miR-132-5p	MET
hsa-miR-132-5p	NDUFA11
hsa-miR-132-5p	NFATC1
hsa-miR-132-5p	NGFR
hsa-miR-132-5p	NLK
hsa-miR-132-5p	NTRK2
hsa-miR-132-5p	PAK1
hsa-miR-132-5p	PECAM1
hsa-miR-132-5p	PEX16
hsa-miR-132-5p	PEX19
hsa-miR-132-5p	PEX5L
hsa-miR-132-5p	PGF
hsa-miR-132-5p	PIAS4
hsa-miR-132-5p	PIK3CD
hsa-miR-132-5p	PIK3R2
hsa-miR-132-5p	PRKAB2
hsa-miR-132-5p	PRKACA
hsa-miR-132-5p	PRKCA
hsa-miR-132-5p	PRKCB
hsa-miR-132-5p	RAC1
hsa-miR-132-5p	RPS6KA2
hsa-miR-132-5p	RPTOR
hsa-miR-132-5p	SDC2
hsa-miR-132-5p	SLC25A17
hsa-miR-132-5p	SMC1A
hsa-miR-132-5p	SOS2
hsa-miR-132-5p	SRC
hsa-miR-132-5p	TGFB2
hsa-miR-132-5p	TNFRSF10B
hsa-miR-132-5p	TRAF6
hsa-miR-132-5p	TXNDC12
hsa-miR-132-5p	ULK1
hsa-miR-132-5p	UQCRQ
hsa-miR-132-5p	YWHAB
hsa-miR-141-3p	ABCD3
hsa-miR-141-3p	ABCD4
hsa-miR-141-3p	ABL1
hsa-miR-141-3p	ACAA1
hsa-miR-141-3p	ACOX1
hsa-miR-141-3p	ACSL3
hsa-miR-141-3p	ACSL6
hsa-miR-141-3p	ACVR1
hsa-miR-141-3p	ACVR2A
hsa-miR-141-3p	ACVR2B
hsa-miR-141-3p	ADCY2
hsa-miR-141-3p	ADCY7
hsa-miR-141-3p	ADCY9
hsa-miR-141-3p	ADIPOR2
hsa-miR-141-3p	AGPS
hsa-miR-141-3p	AKT2
hsa-miR-141-3p	ANAPC10
hsa-miR-141-3p	ANAPC7
hsa-miR-141-3p	ANGPT2
hsa-miR-141-3p	APPL1
hsa-miR-141-3p	ARRB1
hsa-miR-141-3p	ATG12
hsa-miR-141-3p	ATG5
hsa-miR-141-3p	ATM
hsa-miR-141-3p	ATP5G3
hsa-miR-141-3p	ATP5L
hsa-miR-141-3p	ATP6V0A2
hsa-miR-141-3p	ATP6V0B
hsa-miR-141-3p	ATP6V0D2
hsa-miR-141-3p	ATP6V1A
hsa-miR-141-3p	ATP6V1B2
hsa-miR-141-3p	ATP6V1C2
hsa-miR-141-3p	ATP6V1G1
hsa-miR-141-3p	BCL2L11
hsa-miR-141-3p	BIRC3
hsa-miR-141-3p	BMPR1B
hsa-miR-141-3p	BMPR2
hsa-miR-141-3p	CACNA1B
hsa-miR-141-3p	CACNA1C
hsa-miR-141-3p	CACNA1E
hsa-miR-141-3p	CACNA1I
hsa-miR-141-3p	CACNA2D1
hsa-miR-141-3p	CACNB4
hsa-miR-141-3p	CALML4
hsa-miR-141-3p	CASP6
hsa-miR-141-3p	CCL2
hsa-miR-141-3p	CCND1
hsa-miR-141-3p	CCND2
hsa-miR-141-3p	CCNE1
hsa-miR-141-3p	CCNE2
hsa-miR-141-3p	CDC14A
hsa-miR-141-3p	CDC14B
hsa-miR-141-3p	CDC25A
hsa-miR-141-3p	CDC25B
hsa-miR-141-3p	CDC27
hsa-miR-141-3p	CDC7
hsa-miR-141-3p	CDK1
hsa-miR-141-3p	CDK2
hsa-miR-141-3p	CDK6
hsa-miR-141-3p	CDKN1A
hsa-miR-141-3p	CFLAR
hsa-miR-141-3p	CHEK1
hsa-miR-141-3p	COX11
hsa-miR-141-3p	COX15
hsa-miR-141-3p	COX4I1
hsa-miR-141-3p	COX7A2L
hsa-miR-141-3p	CREB1
hsa-miR-141-3p	CREB3L2
hsa-miR-141-3p	CREB5
hsa-miR-141-3p	CREBBP
hsa-miR-141-3p	CRK
hsa-miR-141-3p	CRKL
hsa-miR-141-3p	CSF2RB
hsa-miR-141-3p	CSNK1E
hsa-miR-141-3p	CTSC
hsa-miR-141-3p	CTSO
hsa-miR-141-3p	CTSV
hsa-miR-141-3p	CYCS
hsa-miR-141-3p	DUSP1
hsa-miR-141-3p	DUSP3
hsa-miR-141-3p	DUSP6
hsa-miR-141-3p	DUSP7
hsa-miR-141-3p	E2F2
hsa-miR-141-3p	E2F3
hsa-miR-141-3p	E2F4
hsa-miR-141-3p	EFNA5
hsa-miR-141-3p	EGF
hsa-miR-141-3p	EGFR
hsa-miR-141-3p	EIF4E
hsa-miR-141-3p	EIF4E2
hsa-miR-141-3p	ELK4
hsa-miR-141-3p	EPHA2
hsa-miR-141-3p	ESPL1
hsa-miR-141-3p	FASLG
hsa-miR-141-3p	FBXO32
hsa-miR-141-3p	FGF5
hsa-miR-141-3p	FGF9
hsa-miR-141-3p	FGFR1
hsa-miR-141-3p	FGFR2
hsa-miR-141-3p	FLNC
hsa-miR-141-3p	FLT1
hsa-miR-141-3p	FLT4
hsa-miR-141-3p	FOXO3
hsa-miR-141-3p	G6PC
hsa-miR-141-3p	GGCT
hsa-miR-141-3p	GNA12
hsa-miR-141-3p	GNG12
hsa-miR-141-3p	GPX8
hsa-miR-141-3p	GRB2
hsa-miR-141-3p	GSTT2
hsa-miR-141-3p	GSTT2B
hsa-miR-141-3p	HDAC2
hsa-miR-141-3p	HGF
hsa-miR-141-3p	HOMER1
hsa-miR-141-3p	HOMER2
hsa-miR-141-3p	ICAM1
hsa-miR-141-3p	IGF1R
hsa-miR-141-3p	IGF2
hsa-miR-141-3p	IKBKB
hsa-miR-141-3p	IL1A
hsa-miR-141-3p	IL1RAP
hsa-miR-141-3p	IL7R
hsa-miR-141-3p	INSR
hsa-miR-141-3p	IRAK4
hsa-miR-141-3p	IRS1
hsa-miR-141-3p	IRS2
hsa-miR-141-3p	IRS4
hsa-miR-141-3p	ITGAV
hsa-miR-141-3p	ITGB3
hsa-miR-141-3p	ITPR2
hsa-miR-141-3p	JUN
hsa-miR-141-3p	KDR
hsa-miR-141-3p	KEAP1
hsa-miR-141-3p	KIT
hsa-miR-141-3p	KITLG
hsa-miR-141-3p	KRAS
hsa-miR-141-3p	LAMTOR3
hsa-miR-141-3p	LHPP
hsa-miR-141-3p	LOC400927-CSNK1E
hsa-miR-141-3p	MAP2K4
hsa-miR-141-3p	MAP2K7
hsa-miR-141-3p	MAP3K1
hsa-miR-141-3p	MAP3K13
hsa-miR-141-3p	MAP3K2
hsa-miR-141-3p	MAP3K3
hsa-miR-141-3p	MAP4K4
hsa-miR-141-3p	MAPK1
hsa-miR-141-3p	MAPK10
hsa-miR-141-3p	MAPK14
hsa-miR-141-3p	MAPK8
hsa-miR-141-3p	MAPK9
hsa-miR-141-3p	MCM3
hsa-miR-141-3p	MEF2C
hsa-miR-141-3p	MKNK2
hsa-miR-141-3p	MRAS
hsa-miR-141-3p	NDUFA5
hsa-miR-141-3p	NDUFB4
hsa-miR-141-3p	NDUFB5
hsa-miR-141-3p	NF1
hsa-miR-141-3p	NFATC3
hsa-miR-141-3p	NOS3
hsa-miR-141-3p	NOX1
hsa-miR-141-3p	NTRK2
hsa-miR-141-3p	NUDT12
hsa-miR-141-3p	NUDT19
hsa-miR-141-3p	NUDT7
hsa-miR-141-3p	ORC2
hsa-miR-141-3p	ORC4
hsa-miR-141-3p	PAK1
hsa-miR-141-3p	PARP2
hsa-miR-141-3p	PARP3
hsa-miR-141-3p	PCK1
hsa-miR-141-3p	PDGFA
hsa-miR-141-3p	PDGFD
hsa-miR-141-3p	PDGFRA
hsa-miR-141-3p	PDGFRB
hsa-miR-141-3p	PDPK1
hsa-miR-141-3p	PECAM1
hsa-miR-141-3p	PEX11A
hsa-miR-141-3p	PEX13
hsa-miR-141-3p	PEX26
hsa-miR-141-3p	PEX5
hsa-miR-141-3p	PEX5L
hsa-miR-141-3p	PIK3R1
hsa-miR-141-3p	PIK3R3
hsa-miR-141-3p	PLA2G4D
hsa-miR-141-3p	PLA2G4F
hsa-miR-141-3p	PLK4
hsa-miR-141-3p	PMAIP1
hsa-miR-141-3p	PPARGC1A
hsa-miR-141-3p	PPM1A
hsa-miR-141-3p	PPM1B
hsa-miR-141-3p	PPP5D1
hsa-miR-141-3p	PRKAA1
hsa-miR-141-3p	PRKAA2
hsa-miR-141-3p	PRKAB1
hsa-miR-141-3p	PRKACB
hsa-miR-141-3p	PRKCA
hsa-miR-141-3p	PRKCB
hsa-miR-141-3p	PTEN
hsa-miR-141-3p	RAD21
hsa-miR-141-3p	RAPGEF2
hsa-miR-141-3p	RASA1
hsa-miR-141-3p	RASA2
hsa-miR-141-3p	RASGRF2
hsa-miR-141-3p	RB1CC1
hsa-miR-141-3p	RBL1
hsa-miR-141-3p	RBL2
hsa-miR-141-3p	RHEB
hsa-miR-141-3p	RIPK1
hsa-miR-141-3p	RPS6KA3
hsa-miR-141-3p	RPS6KA6
hsa-miR-141-3p	RPS6KB1
hsa-miR-141-3p	RRM2B
hsa-miR-141-3p	S1PR1
hsa-miR-141-3p	SCP2
hsa-miR-141-3p	SDC2
hsa-miR-141-3p	SDHC
hsa-miR-141-3p	SDHD
hsa-miR-141-3p	SELE
hsa-miR-141-3p	SESN2
hsa-miR-141-3p	SESN3
hsa-miR-141-3p	SGK1
hsa-miR-141-3p	SIRT1
hsa-miR-141-3p	SKP1
hsa-miR-141-3p	SLC25A17
hsa-miR-141-3p	SMAD2
hsa-miR-141-3p	SMAD4
hsa-miR-141-3p	SMC1A
hsa-miR-141-3p	SQSTM1
hsa-miR-141-3p	SRC
hsa-miR-141-3p	STK3
hsa-miR-141-3p	STMN1
hsa-miR-141-3p	SUMO1
hsa-miR-141-3p	TAB1
hsa-miR-141-3p	TAB2
hsa-miR-141-3p	TAOK1
hsa-miR-141-3p	TFDP2
hsa-miR-141-3p	TGFB2
hsa-miR-141-3p	TGFBR1
hsa-miR-141-3p	TGFBR2
hsa-miR-141-3p	THBD
hsa-miR-141-3p	TNFRSF10B
hsa-miR-141-3p	TP53
hsa-miR-141-3p	TRAF6
hsa-miR-141-3p	TSC1
hsa-miR-141-3p	TXNDC12
hsa-miR-141-3p	ULK1
hsa-miR-141-3p	XIAP
hsa-miR-141-3p	YWHAE
hsa-miR-141-3p	YWHAG
hsa-miR-141-3p	ZAK
hsa-miR-16-2-3p	ABCD2
hsa-miR-16-2-3p	ACOX1
hsa-miR-16-2-3p	ACSL3
hsa-miR-16-2-3p	ACSL4
hsa-miR-16-2-3p	ACSL6
hsa-miR-16-2-3p	ACVR1
hsa-miR-16-2-3p	ACVR2A
hsa-miR-16-2-3p	ACVR2B
hsa-miR-16-2-3p	ADCY2
hsa-miR-16-2-3p	ADCY9
hsa-miR-16-2-3p	AGPS
hsa-miR-16-2-3p	AKT3
hsa-miR-16-2-3p	ANAPC1
hsa-miR-16-2-3p	ANGPT1
hsa-miR-16-2-3p	APAF1
hsa-miR-16-2-3p	ATG12
hsa-miR-16-2-3p	ATG5
hsa-miR-16-2-3p	ATM
hsa-miR-16-2-3p	ATP5G3
hsa-miR-16-2-3p	ATP6V0A2
hsa-miR-16-2-3p	ATP6V0A4
hsa-miR-16-2-3p	ATP6V0C
hsa-miR-16-2-3p	ATP6V1C1
hsa-miR-16-2-3p	ATP6V1C2
hsa-miR-16-2-3p	BCL2
hsa-miR-16-2-3p	BCL2L11
hsa-miR-16-2-3p	BIRC2
hsa-miR-16-2-3p	BIRC3
hsa-miR-16-2-3p	BIRC5
hsa-miR-16-2-3p	BMPR1A
hsa-miR-16-2-3p	BMPR1B
hsa-miR-16-2-3p	BMPR2
hsa-miR-16-2-3p	BNIP3
hsa-miR-16-2-3p	C8orf44-SGK3
hsa-miR-16-2-3p	CACNA1C
hsa-miR-16-2-3p	CACNA1E
hsa-miR-16-2-3p	CACNA2D1
hsa-miR-16-2-3p	CACNB2
hsa-miR-16-2-3p	CALM1
hsa-miR-16-2-3p	CALM3
hsa-miR-16-2-3p	CAPN2
hsa-miR-16-2-3p	CASP10
hsa-miR-16-2-3p	CASP3
hsa-miR-16-2-3p	CASP8
hsa-miR-16-2-3p	CAV2
hsa-miR-16-2-3p	CCNB3
hsa-miR-16-2-3p	CCND2
hsa-miR-16-2-3p	CCNG2
hsa-miR-16-2-3p	CDC25A
hsa-miR-16-2-3p	CDC27
hsa-miR-16-2-3p	CDC7
hsa-miR-16-2-3p	CDK1
hsa-miR-16-2-3p	CDK6
hsa-miR-16-2-3p	CFLAR
hsa-miR-16-2-3p	CHAC2
hsa-miR-16-2-3p	COX11
hsa-miR-16-2-3p	COX15
hsa-miR-16-2-3p	CREB1
hsa-miR-16-2-3p	CREB3L2
hsa-miR-16-2-3p	CREB5
hsa-miR-16-2-3p	CREBBP
hsa-miR-16-2-3p	CROT
hsa-miR-16-2-3p	CSF2RB
hsa-miR-16-2-3p	CSNK1E
hsa-miR-16-2-3p	CTSC
hsa-miR-16-2-3p	CTSS
hsa-miR-16-2-3p	CTSZ
hsa-miR-16-2-3p	CYCS
hsa-miR-16-2-3p	DBF4
hsa-miR-16-2-3p	DUSP16
hsa-miR-16-2-3p	DUSP2
hsa-miR-16-2-3p	EDN1
hsa-miR-16-2-3p	EGFR
hsa-miR-16-2-3p	EHHADH
hsa-miR-16-2-3p	ELK4
hsa-miR-16-2-3p	EP300
hsa-miR-16-2-3p	ERBB4
hsa-miR-16-2-3p	FAR2
hsa-miR-16-2-3p	FASLG
hsa-miR-16-2-3p	FBXO32
hsa-miR-16-2-3p	FGF18
hsa-miR-16-2-3p	FGF2
hsa-miR-16-2-3p	FGF20
hsa-miR-16-2-3p	FGF23
hsa-miR-16-2-3p	FGF5
hsa-miR-16-2-3p	FGF9
hsa-miR-16-2-3p	FLNB
hsa-miR-16-2-3p	FLT1
hsa-miR-16-2-3p	FLT3
hsa-miR-16-2-3p	FOXO3
hsa-miR-16-2-3p	GNA12
hsa-miR-16-2-3p	GSTM3
hsa-miR-16-2-3p	HDAC2
hsa-miR-16-2-3p	HMGCLL1
hsa-miR-16-2-3p	HOMER2
hsa-miR-16-2-3p	IFNG
hsa-miR-16-2-3p	IL1A
hsa-miR-16-2-3p	IL1RAP
hsa-miR-16-2-3p	INSR
hsa-miR-16-2-3p	IRAK4
hsa-miR-16-2-3p	IRS1
hsa-miR-16-2-3p	ITGAV
hsa-miR-16-2-3p	ITPR2
hsa-miR-16-2-3p	KIT
hsa-miR-16-2-3p	KL
hsa-miR-16-2-3p	KLF2
hsa-miR-16-2-3p	KRAS
hsa-miR-16-2-3p	LAMTOR3
hsa-miR-16-2-3p	LMNB1
hsa-miR-16-2-3p	LOC400927-CSNK1E
hsa-miR-16-2-3p	MAD2L1
hsa-miR-16-2-3p	MAP2K4
hsa-miR-16-2-3p	MAP3K13
hsa-miR-16-2-3p	MAP3K2
hsa-miR-16-2-3p	MAP3K5
hsa-miR-16-2-3p	MAP3K7
hsa-miR-16-2-3p	MAPK1
hsa-miR-16-2-3p	MAPK10
hsa-miR-16-2-3p	MAPK8
hsa-miR-16-2-3p	MAPK9
hsa-miR-16-2-3p	MAPKAPK5
hsa-miR-16-2-3p	MCL1
hsa-miR-16-2-3p	MDM2
hsa-miR-16-2-3p	MET
hsa-miR-16-2-3p	MGST2
hsa-miR-16-2-3p	MGST3
hsa-miR-16-2-3p	MLYCD
hsa-miR-16-2-3p	MRAS
hsa-miR-16-2-3p	MYC
hsa-miR-16-2-3p	NAT8
hsa-miR-16-2-3p	NDUFA11
hsa-miR-16-2-3p	NDUFA5
hsa-miR-16-2-3p	NDUFA6
hsa-miR-16-2-3p	NDUFC2-KCTD14
hsa-miR-16-2-3p	NDUFS1
hsa-miR-16-2-3p	NLK
hsa-miR-16-2-3p	NRAS
hsa-miR-16-2-3p	NTRK2
hsa-miR-16-2-3p	NUDT12
hsa-miR-16-2-3p	ORC4
hsa-miR-16-2-3p	ORC5
hsa-miR-16-2-3p	PCK1
hsa-miR-16-2-3p	PCNA
hsa-miR-16-2-3p	PDGFB
hsa-miR-16-2-3p	PDGFC
hsa-miR-16-2-3p	PDGFD
hsa-miR-16-2-3p	PDPK1
hsa-miR-16-2-3p	PEX13
hsa-miR-16-2-3p	PEX19
hsa-miR-16-2-3p	PEX2
hsa-miR-16-2-3p	PEX5L
hsa-miR-16-2-3p	PIK3CB
hsa-miR-16-2-3p	PIK3R1
hsa-miR-16-2-3p	PMAIP1
hsa-miR-16-2-3p	PPARGC1A
hsa-miR-16-2-3p	PPM1A
hsa-miR-16-2-3p	PPM1B
hsa-miR-16-2-3p	PRKAA1
hsa-miR-16-2-3p	PRKAA2
hsa-miR-16-2-3p	PRKAB2
hsa-miR-16-2-3p	PRKACB
hsa-miR-16-2-3p	PRKCB
hsa-miR-16-2-3p	PTEN
hsa-miR-16-2-3p	PTPN13
hsa-miR-16-2-3p	PTPRR
hsa-miR-16-2-3p	RAD21
hsa-miR-16-2-3p	RAP1A
hsa-miR-16-2-3p	RASA2
hsa-miR-16-2-3p	RASGRP3
hsa-miR-16-2-3p	RB1CC1
hsa-miR-16-2-3p	RBL1
hsa-miR-16-2-3p	RPS6KA3
hsa-miR-16-2-3p	RPS6KA5
hsa-miR-16-2-3p	RPS6KA6
hsa-miR-16-2-3p	RPS6KB1
hsa-miR-16-2-3p	RRM2
hsa-miR-16-2-3p	SDC2
hsa-miR-16-2-3p	SESN3
hsa-miR-16-2-3p	SGK3
hsa-miR-16-2-3p	SKP1
hsa-miR-16-2-3p	SMAD2
hsa-miR-16-2-3p	SMAD3
hsa-miR-16-2-3p	SMC1A
hsa-miR-16-2-3p	SOS1
hsa-miR-16-2-3p	SQSTM1
hsa-miR-16-2-3p	STAG2
hsa-miR-16-2-3p	STK3
hsa-miR-16-2-3p	SUMO3
hsa-miR-16-2-3p	TAOK1
hsa-miR-16-2-3p	TAOK3
hsa-miR-16-2-3p	TEK
hsa-miR-16-2-3p	TFDP2
hsa-miR-16-2-3p	TGFB2
hsa-miR-16-2-3p	TGFB3
hsa-miR-16-2-3p	TGFBR1
hsa-miR-16-2-3p	TRAF1
hsa-miR-16-2-3p	TRAF6
hsa-miR-16-2-3p	TSC1
hsa-miR-16-2-3p	TXNDC12
hsa-miR-16-2-3p	ULK1
hsa-miR-16-2-3p	UQCRB
hsa-miR-16-2-3p	VCAM1
hsa-miR-16-2-3p	VEGFC
hsa-miR-16-2-3p	XIAP
hsa-miR-16-2-3p	YWHAE
hsa-miR-16-2-3p	YWHAG
hsa-miR-16-2-3p	YWHAZ
hsa-miR-16-2-3p	ZAK
hsa-miR-200a-3p	ABCD4
hsa-miR-200a-3p	ABL1
hsa-miR-200a-3p	ACAA1
hsa-miR-200a-3p	ACOX1
hsa-miR-200a-3p	ACSL3
hsa-miR-200a-3p	ACSL6
hsa-miR-200a-3p	ACVR2A
hsa-miR-200a-3p	ACVR2B
hsa-miR-200a-3p	ADCY1
hsa-miR-200a-3p	ADCY2
hsa-miR-200a-3p	ADCY7
hsa-miR-200a-3p	ADCY9
hsa-miR-200a-3p	AGPS
hsa-miR-200a-3p	ANAPC7
hsa-miR-200a-3p	ANGPT2
hsa-miR-200a-3p	APPL1
hsa-miR-200a-3p	ARRB1
hsa-miR-200a-3p	ATG12
hsa-miR-200a-3p	ATG5
hsa-miR-200a-3p	ATM
hsa-miR-200a-3p	ATP5G3
hsa-miR-200a-3p	ATP5L
hsa-miR-200a-3p	ATP6V0A2
hsa-miR-200a-3p	ATP6V0B
hsa-miR-200a-3p	ATP6V0D2
hsa-miR-200a-3p	ATP6V1A
hsa-miR-200a-3p	ATP6V1B2
hsa-miR-200a-3p	ATP6V1C2
hsa-miR-200a-3p	ATP6V1G1
hsa-miR-200a-3p	BCL2L11
hsa-miR-200a-3p	BID
hsa-miR-200a-3p	BIRC3
hsa-miR-200a-3p	BMPR1B
hsa-miR-200a-3p	BMPR2
hsa-miR-200a-3p	CACNA1B
hsa-miR-200a-3p	CACNA1E
hsa-miR-200a-3p	CACNA1I
hsa-miR-200a-3p	CACNA2D1
hsa-miR-200a-3p	CACNB4
hsa-miR-200a-3p	CALML4
hsa-miR-200a-3p	CASP6
hsa-miR-200a-3p	CCND2
hsa-miR-200a-3p	CCNE1
hsa-miR-200a-3p	CCNE2
hsa-miR-200a-3p	CDC14A
hsa-miR-200a-3p	CDC14B
hsa-miR-200a-3p	CDC25A
hsa-miR-200a-3p	CDC25B
hsa-miR-200a-3p	CDC27
hsa-miR-200a-3p	CDK1
hsa-miR-200a-3p	CDK2
hsa-miR-200a-3p	CDKN1A
hsa-miR-200a-3p	CFLAR
hsa-miR-200a-3p	CHEK1
hsa-miR-200a-3p	COX11
hsa-miR-200a-3p	COX15
hsa-miR-200a-3p	COX4I1
hsa-miR-200a-3p	COX7A2L
hsa-miR-200a-3p	CREB1
hsa-miR-200a-3p	CREB3L2
hsa-miR-200a-3p	CREB5
hsa-miR-200a-3p	CREBBP
hsa-miR-200a-3p	CRK
hsa-miR-200a-3p	CRKL
hsa-miR-200a-3p	CSF2RB
hsa-miR-200a-3p	CSNK1E
hsa-miR-200a-3p	CYCS
hsa-miR-200a-3p	DUSP1
hsa-miR-200a-3p	DUSP3
hsa-miR-200a-3p	DUSP6
hsa-miR-200a-3p	E2F2
hsa-miR-200a-3p	E2F3
hsa-miR-200a-3p	E2F4
hsa-miR-200a-3p	EFNA5
hsa-miR-200a-3p	EGF
hsa-miR-200a-3p	EGFR
hsa-miR-200a-3p	EIF4E
hsa-miR-200a-3p	EIF4E2
hsa-miR-200a-3p	ELK4
hsa-miR-200a-3p	EPHA2
hsa-miR-200a-3p	ESPL1
hsa-miR-200a-3p	FASLG
hsa-miR-200a-3p	FBXO32
hsa-miR-200a-3p	FGF5
hsa-miR-200a-3p	FGF9
hsa-miR-200a-3p	FGFR1
hsa-miR-200a-3p	FGFR2
hsa-miR-200a-3p	FLNC
hsa-miR-200a-3p	FLT1
hsa-miR-200a-3p	FLT4
hsa-miR-200a-3p	FOXO3
hsa-miR-200a-3p	G6PC
hsa-miR-200a-3p	GGCT
hsa-miR-200a-3p	GNA12
hsa-miR-200a-3p	GNG12
hsa-miR-200a-3p	GRB2
hsa-miR-200a-3p	GSTT2
hsa-miR-200a-3p	GSTT2B
hsa-miR-200a-3p	HDAC2
hsa-miR-200a-3p	HGF
hsa-miR-200a-3p	HOMER2
hsa-miR-200a-3p	ICAM1
hsa-miR-200a-3p	IGF1
hsa-miR-200a-3p	IGF1R
hsa-miR-200a-3p	IGF2
hsa-miR-200a-3p	IKBKB
hsa-miR-200a-3p	IL1A
hsa-miR-200a-3p	IL1RAP
hsa-miR-200a-3p	IL7R
hsa-miR-200a-3p	INSR
hsa-miR-200a-3p	IRAK4
hsa-miR-200a-3p	IRS1
hsa-miR-200a-3p	IRS2
hsa-miR-200a-3p	IRS4
hsa-miR-200a-3p	ITGAV
hsa-miR-200a-3p	ITGB3
hsa-miR-200a-3p	ITPR2
hsa-miR-200a-3p	JUN
hsa-miR-200a-3p	KDR
hsa-miR-200a-3p	KEAP1
hsa-miR-200a-3p	KIT
hsa-miR-200a-3p	KITLG
hsa-miR-200a-3p	KRAS
hsa-miR-200a-3p	LAMTOR3
hsa-miR-200a-3p	LHPP
hsa-miR-200a-3p	LOC400927-CSNK1E
hsa-miR-200a-3p	MAP2K4
hsa-miR-200a-3p	MAP2K7
hsa-miR-200a-3p	MAP3K13
hsa-miR-200a-3p	MAP3K2
hsa-miR-200a-3p	MAP3K3
hsa-miR-200a-3p	MAP3K4
hsa-miR-200a-3p	MAP4K4
hsa-miR-200a-3p	MAPK1
hsa-miR-200a-3p	MAPK10
hsa-miR-200a-3p	MAPK14
hsa-miR-200a-3p	MAPK8
hsa-miR-200a-3p	MAPK9
hsa-miR-200a-3p	MCM3
hsa-miR-200a-3p	MEF2C
hsa-miR-200a-3p	MKNK2
hsa-miR-200a-3p	MRAS
hsa-miR-200a-3p	NDUFA4
hsa-miR-200a-3p	NDUFA5
hsa-miR-200a-3p	NDUFB4
hsa-miR-200a-3p	NDUFB5
hsa-miR-200a-3p	NF1
hsa-miR-200a-3p	NOS3
hsa-miR-200a-3p	NOX1
hsa-miR-200a-3p	NTRK2
hsa-miR-200a-3p	NUDT12
hsa-miR-200a-3p	NUDT7
hsa-miR-200a-3p	ORC2
hsa-miR-200a-3p	ORC4
hsa-miR-200a-3p	PAK1
hsa-miR-200a-3p	PARP2
hsa-miR-200a-3p	PARP3
hsa-miR-200a-3p	PCK1
hsa-miR-200a-3p	PDGFA
hsa-miR-200a-3p	PDGFD
hsa-miR-200a-3p	PDGFRA
hsa-miR-200a-3p	PDGFRB
hsa-miR-200a-3p	PDPK1
hsa-miR-200a-3p	PECAM1
hsa-miR-200a-3p	PEX11A
hsa-miR-200a-3p	PEX13
hsa-miR-200a-3p	PEX26
hsa-miR-200a-3p	PEX5
hsa-miR-200a-3p	PEX5L
hsa-miR-200a-3p	PEX6
hsa-miR-200a-3p	PIK3R1
hsa-miR-200a-3p	PIK3R3
hsa-miR-200a-3p	PLA2G4F
hsa-miR-200a-3p	PMAIP1
hsa-miR-200a-3p	PPARGC1A
hsa-miR-200a-3p	PPM1A
hsa-miR-200a-3p	PRKAA1
hsa-miR-200a-3p	PRKAA2
hsa-miR-200a-3p	PRKAB1
hsa-miR-200a-3p	PRKACB
hsa-miR-200a-3p	PRKCA
hsa-miR-200a-3p	PRKCB
hsa-miR-200a-3p	PTEN
hsa-miR-200a-3p	RAD21
hsa-miR-200a-3p	RAPGEF2
hsa-miR-200a-3p	RASA1
hsa-miR-200a-3p	RASA2
hsa-miR-200a-3p	RASGRF2
hsa-miR-200a-3p	RB1CC1
hsa-miR-200a-3p	RBL1
hsa-miR-200a-3p	RBL2
hsa-miR-200a-3p	RHEB
hsa-miR-200a-3p	RIPK1
hsa-miR-200a-3p	RPS6KA3
hsa-miR-200a-3p	RPS6KA6
hsa-miR-200a-3p	RRM2B
hsa-miR-200a-3p	S1PR1
hsa-miR-200a-3p	SCP2
hsa-miR-200a-3p	SDC2
hsa-miR-200a-3p	SDHC
hsa-miR-200a-3p	SDHD
hsa-miR-200a-3p	SELE
hsa-miR-200a-3p	SESN2
hsa-miR-200a-3p	SGK1
hsa-miR-200a-3p	SIRT1
hsa-miR-200a-3p	SLC25A17
hsa-miR-200a-3p	SMAD2
hsa-miR-200a-3p	SMAD4
hsa-miR-200a-3p	SMC1A
hsa-miR-200a-3p	SQSTM1
hsa-miR-200a-3p	SRC
hsa-miR-200a-3p	STK3
hsa-miR-200a-3p	SUMO1
hsa-miR-200a-3p	TAB1
hsa-miR-200a-3p	TAB2
hsa-miR-200a-3p	TAOK1
hsa-miR-200a-3p	TFDP2
hsa-miR-200a-3p	TGFB2
hsa-miR-200a-3p	TGFBR1
hsa-miR-200a-3p	TGFBR2
hsa-miR-200a-3p	THBD
hsa-miR-200a-3p	TNFRSF10B
hsa-miR-200a-3p	TP53
hsa-miR-200a-3p	TRAF6
hsa-miR-200a-3p	TSC1
hsa-miR-200a-3p	TXNDC12
hsa-miR-200a-3p	VCAM1
hsa-miR-200a-3p	XIAP
hsa-miR-200a-3p	YWHAB
hsa-miR-200a-3p	YWHAE
hsa-miR-200a-3p	YWHAG
hsa-miR-200a-3p	ZAK
hsa-miR-200b-3p	ABCD2
hsa-miR-200b-3p	ABCD3
hsa-miR-200b-3p	ABL1
hsa-miR-200b-3p	ACAA1
hsa-miR-200b-3p	ACOX1
hsa-miR-200b-3p	ACOX2
hsa-miR-200b-3p	ACSL3
hsa-miR-200b-3p	ACVR2A
hsa-miR-200b-3p	ACVR2B
hsa-miR-200b-3p	ADCY2
hsa-miR-200b-3p	ADCY9
hsa-miR-200b-3p	ADIPOQ
hsa-miR-200b-3p	ADIPOR2
hsa-miR-200b-3p	AGPS
hsa-miR-200b-3p	AKT2
hsa-miR-200b-3p	AMACR
hsa-miR-200b-3p	ANAPC13
hsa-miR-200b-3p	ANGPT2
hsa-miR-200b-3p	APAF1
hsa-miR-200b-3p	APPL1
hsa-miR-200b-3p	ATP5B
hsa-miR-200b-3p	ATP5G3
hsa-miR-200b-3p	ATP6V0A2
hsa-miR-200b-3p	ATP6V1E1
hsa-miR-200b-3p	BCL2
hsa-miR-200b-3p	BID
hsa-miR-200b-3p	BMPR1A
hsa-miR-200b-3p	CACNA1B
hsa-miR-200b-3p	CACNA1C
hsa-miR-200b-3p	CACNA2D1
hsa-miR-200b-3p	CACNA2D4
hsa-miR-200b-3p	CACNB2
hsa-miR-200b-3p	CACNB4
hsa-miR-200b-3p	CACNG2
hsa-miR-200b-3p	CACNG8
hsa-miR-200b-3p	CASP10
hsa-miR-200b-3p	CASP2
hsa-miR-200b-3p	CAV2
hsa-miR-200b-3p	CCNA2
hsa-miR-200b-3p	CCNE2
hsa-miR-200b-3p	CCNG2
hsa-miR-200b-3p	CDC14A
hsa-miR-200b-3p	CDC14B
hsa-miR-200b-3p	CDC25B
hsa-miR-200b-3p	CDC27
hsa-miR-200b-3p	CDC42
hsa-miR-200b-3p	CDC7
hsa-miR-200b-3p	CDK1
hsa-miR-200b-3p	CDK2
hsa-miR-200b-3p	CDK6
hsa-miR-200b-3p	CDKN1B
hsa-miR-200b-3p	CDKN2B
hsa-miR-200b-3p	CFLAR
hsa-miR-200b-3p	CHAC2
hsa-miR-200b-3p	COX11
hsa-miR-200b-3p	COX15
hsa-miR-200b-3p	CREB1
hsa-miR-200b-3p	CREB3L2
hsa-miR-200b-3p	CREB5
hsa-miR-200b-3p	CREBBP
hsa-miR-200b-3p	CRKL
hsa-miR-200b-3p	CROT
hsa-miR-200b-3p	CSF1
hsa-miR-200b-3p	CSF2RB
hsa-miR-200b-3p	CTSB
hsa-miR-200b-3p	CTSC
hsa-miR-200b-3p	CYCS
hsa-miR-200b-3p	DAB2IP
hsa-miR-200b-3p	DUSP1
hsa-miR-200b-3p	DUSP3
hsa-miR-200b-3p	DUSP4
hsa-miR-200b-3p	DUSP6
hsa-miR-200b-3p	DUSP7
hsa-miR-200b-3p	E2F3
hsa-miR-200b-3p	ECSIT
hsa-miR-200b-3p	EFNA1
hsa-miR-200b-3p	EIF2S1
hsa-miR-200b-3p	EIF4E
hsa-miR-200b-3p	EIF4E2
hsa-miR-200b-3p	ELK4
hsa-miR-200b-3p	ERBB4
hsa-miR-200b-3p	EREG
hsa-miR-200b-3p	FAR2
hsa-miR-200b-3p	FGF2
hsa-miR-200b-3p	FGF23
hsa-miR-200b-3p	FGF5
hsa-miR-200b-3p	FGF9
hsa-miR-200b-3p	FGFR1
hsa-miR-200b-3p	FGFR2
hsa-miR-200b-3p	FLT1
hsa-miR-200b-3p	FLT4
hsa-miR-200b-3p	FOXG1
hsa-miR-200b-3p	FOXO1
hsa-miR-200b-3p	FOXO3
hsa-miR-200b-3p	G6PC
hsa-miR-200b-3p	GABARAPL1
hsa-miR-200b-3p	GCLM
hsa-miR-200b-3p	GNG12
hsa-miR-200b-3p	GPX6
hsa-miR-200b-3p	GPX8
hsa-miR-200b-3p	GSK3B
hsa-miR-200b-3p	GSTA2
hsa-miR-200b-3p	GSTA4
hsa-miR-200b-3p	GSTM3
hsa-miR-200b-3p	HACL1
hsa-miR-200b-3p	HGF
hsa-miR-200b-3p	HMGCLL1
hsa-miR-200b-3p	HMOX1
hsa-miR-200b-3p	ICAM1
hsa-miR-200b-3p	IDH1
hsa-miR-200b-3p	IDH2
hsa-miR-200b-3p	IKBKB
hsa-miR-200b-3p	IL1A
hsa-miR-200b-3p	IL7R
hsa-miR-200b-3p	IRAK4
hsa-miR-200b-3p	IRS1
hsa-miR-200b-3p	IRS2
hsa-miR-200b-3p	ITGAV
hsa-miR-200b-3p	ITGB3
hsa-miR-200b-3p	ITPR1
hsa-miR-200b-3p	ITPR2
hsa-miR-200b-3p	JUN
hsa-miR-200b-3p	KDR
hsa-miR-200b-3p	KRAS
hsa-miR-200b-3p	LAMTOR3
hsa-miR-200b-3p	MAP2K4
hsa-miR-200b-3p	MAP3K1
hsa-miR-200b-3p	MAP3K13
hsa-miR-200b-3p	MAP3K2
hsa-miR-200b-3p	MAP3K3
hsa-miR-200b-3p	MAP3K5
hsa-miR-200b-3p	MAP3K8
hsa-miR-200b-3p	MAP4K3
hsa-miR-200b-3p	MAP4K4
hsa-miR-200b-3p	MAPK10
hsa-miR-200b-3p	MAPK13
hsa-miR-200b-3p	MAPK7
hsa-miR-200b-3p	MAPK8
hsa-miR-200b-3p	MAPK9
hsa-miR-200b-3p	MCM4
hsa-miR-200b-3p	MKNK2
hsa-miR-200b-3p	MRAS
hsa-miR-200b-3p	MYD88
hsa-miR-200b-3p	NDUFA11
hsa-miR-200b-3p	NDUFA5
hsa-miR-200b-3p	NDUFA9
hsa-miR-200b-3p	NDUFB5
hsa-miR-200b-3p	NDUFS4
hsa-miR-200b-3p	NF1
hsa-miR-200b-3p	NOS3
hsa-miR-200b-3p	NTF3
hsa-miR-200b-3p	NTRK2
hsa-miR-200b-3p	NUDT19
hsa-miR-200b-3p	ORC4
hsa-miR-200b-3p	PAK2
hsa-miR-200b-3p	PARP3
hsa-miR-200b-3p	PDGFRA
hsa-miR-200b-3p	PDPK1
hsa-miR-200b-3p	PEX11A
hsa-miR-200b-3p	PEX2
hsa-miR-200b-3p	PEX5L
hsa-miR-200b-3p	PIK3CB
hsa-miR-200b-3p	PIK3R3
hsa-miR-200b-3p	PLA2G4A
hsa-miR-200b-3p	PLAT
hsa-miR-200b-3p	PLK2
hsa-miR-200b-3p	PMAIP1
hsa-miR-200b-3p	PPARGC1A
hsa-miR-200b-3p	PPM1A
hsa-miR-200b-3p	PPM1B
hsa-miR-200b-3p	PRKAA2
hsa-miR-200b-3p	PRKAB1
hsa-miR-200b-3p	PRKAB2
hsa-miR-200b-3p	PRKACB
hsa-miR-200b-3p	PRKAG2
hsa-miR-200b-3p	PRKCA
hsa-miR-200b-3p	PRKCB
hsa-miR-200b-3p	PTEN
hsa-miR-200b-3p	PTPN13
hsa-miR-200b-3p	RAC1
hsa-miR-200b-3p	RAG1
hsa-miR-200b-3p	RAP1B
hsa-miR-200b-3p	RAPGEF2
hsa-miR-200b-3p	RASA2
hsa-miR-200b-3p	RASGRP1
hsa-miR-200b-3p	RB1
hsa-miR-200b-3p	RBL1
hsa-miR-200b-3p	RHOA
hsa-miR-200b-3p	RPS6KA2
hsa-miR-200b-3p	RPS6KA3
hsa-miR-200b-3p	RPS6KA6
hsa-miR-200b-3p	RPS6KB1
hsa-miR-200b-3p	RRAS2
hsa-miR-200b-3p	RRM2
hsa-miR-200b-3p	RRM2B
hsa-miR-200b-3p	SCP2
hsa-miR-200b-3p	SDC2
hsa-miR-200b-3p	SEPT4
hsa-miR-200b-3p	SESN1
hsa-miR-200b-3p	SESN3
hsa-miR-200b-3p	SETD7
hsa-miR-200b-3p	SKP1
hsa-miR-200b-3p	SMAD2
hsa-miR-200b-3p	SMAD3
hsa-miR-200b-3p	SMAD4
hsa-miR-200b-3p	SMC1A
hsa-miR-200b-3p	SOS1
hsa-miR-200b-3p	SRF
hsa-miR-200b-3p	STK4
hsa-miR-200b-3p	TAB1
hsa-miR-200b-3p	TAOK1
hsa-miR-200b-3p	TAOK3
hsa-miR-200b-3p	TFDP2
hsa-miR-200b-3p	TGFBR1
hsa-miR-200b-3p	TSC1
hsa-miR-200b-3p	TXNDC12
hsa-miR-200b-3p	VEGFA
hsa-miR-200b-3p	XIAP
hsa-miR-200b-3p	YWHAB
hsa-miR-200b-3p	YWHAG
hsa-miR-200b-3p	ZAK
hsa-miR-203a-3p	ABCD2
hsa-miR-203a-3p	ABL1
hsa-miR-203a-3p	ACAA1
hsa-miR-203a-3p	ACSL1
hsa-miR-203a-3p	ACSL4
hsa-miR-203a-3p	ACSL6
hsa-miR-203a-3p	ACVR1
hsa-miR-203a-3p	ACVR2A
hsa-miR-203a-3p	ACVR2B
hsa-miR-203a-3p	ADCY1
hsa-miR-203a-3p	ADCY5
hsa-miR-203a-3p	ADCY9
hsa-miR-203a-3p	ADIPOR2
hsa-miR-203a-3p	AGPS
hsa-miR-203a-3p	AKT1
hsa-miR-203a-3p	AKT2
hsa-miR-203a-3p	AKT3
hsa-miR-203a-3p	ANAPC1
hsa-miR-203a-3p	ANAPC10
hsa-miR-203a-3p	ANAPC7
hsa-miR-203a-3p	ANGPT2
hsa-miR-203a-3p	APPL1
hsa-miR-203a-3p	ATF2
hsa-miR-203a-3p	ATG5
hsa-miR-203a-3p	ATM
hsa-miR-203a-3p	ATP5G3
hsa-miR-203a-3p	ATP5J
hsa-miR-203a-3p	ATP5L
hsa-miR-203a-3p	ATP6V1C1
hsa-miR-203a-3p	ATP6V1C2
hsa-miR-203a-3p	ATP6V1D
hsa-miR-203a-3p	BCL2
hsa-miR-203a-3p	BCL2L11
hsa-miR-203a-3p	BDNF
hsa-miR-203a-3p	BIRC2
hsa-miR-203a-3p	BIRC5
hsa-miR-203a-3p	BMPR1B
hsa-miR-203a-3p	BMPR2
hsa-miR-203a-3p	BNIP3
hsa-miR-203a-3p	BUB1
hsa-miR-203a-3p	BUB3
hsa-miR-203a-3p	C8orf44-SGK3
hsa-miR-203a-3p	CACNA1E
hsa-miR-203a-3p	CACNA2D1
hsa-miR-203a-3p	CACNA2D2
hsa-miR-203a-3p	CACNB1
hsa-miR-203a-3p	CACNB4
hsa-miR-203a-3p	CACNG8
hsa-miR-203a-3p	CALM1
hsa-miR-203a-3p	CALM3
hsa-miR-203a-3p	CALML4
hsa-miR-203a-3p	CAMK4
hsa-miR-203a-3p	CAMKK2
hsa-miR-203a-3p	CASP10
hsa-miR-203a-3p	CASP2
hsa-miR-203a-3p	CASP3
hsa-miR-203a-3p	CASP9
hsa-miR-203a-3p	CAV1
hsa-miR-203a-3p	CAV2
hsa-miR-203a-3p	CCND1
hsa-miR-203a-3p	CCND2
hsa-miR-203a-3p	CCNG2
hsa-miR-203a-3p	CDC27
hsa-miR-203a-3p	CDK6
hsa-miR-203a-3p	CDKN1A
hsa-miR-203a-3p	CFLAR
hsa-miR-203a-3p	CHUK
hsa-miR-203a-3p	COX10
hsa-miR-203a-3p	COX15
hsa-miR-203a-3p	CREB1
hsa-miR-203a-3p	CREB3
hsa-miR-203a-3p	CREB3L2
hsa-miR-203a-3p	CREB3L4
hsa-miR-203a-3p	CREB5
hsa-miR-203a-3p	CRK
hsa-miR-203a-3p	CRKL
hsa-miR-203a-3p	CSF1R
hsa-miR-203a-3p	CTSC
hsa-miR-203a-3p	CTSS
hsa-miR-203a-3p	CUL1
hsa-miR-203a-3p	DDO
hsa-miR-203a-3p	DFFA
hsa-miR-203a-3p	DIABLO
hsa-miR-203a-3p	DUSP4
hsa-miR-203a-3p	DUSP5
hsa-miR-203a-3p	DUSP7
hsa-miR-203a-3p	E2F1
hsa-miR-203a-3p	E2F3
hsa-miR-203a-3p	ECI2
hsa-miR-203a-3p	EDN1
hsa-miR-203a-3p	EFNA2
hsa-miR-203a-3p	EFNA5
hsa-miR-203a-3p	EGF
hsa-miR-203a-3p	EGFR
hsa-miR-203a-3p	EHMT1
hsa-miR-203a-3p	EIF2S1
hsa-miR-203a-3p	EIF4E
hsa-miR-203a-3p	ELK4
hsa-miR-203a-3p	EREG
hsa-miR-203a-3p	FAS
hsa-miR-203a-3p	FASLG
hsa-miR-203a-3p	FBXO32
hsa-miR-203a-3p	FGF2
hsa-miR-203a-3p	FGF9
hsa-miR-203a-3p	FLNB
hsa-miR-203a-3p	FLT1
hsa-miR-203a-3p	FLT3
hsa-miR-203a-3p	FOXG1
hsa-miR-203a-3p	FOXO3
hsa-miR-203a-3p	FZR1
hsa-miR-203a-3p	G6PC2
hsa-miR-203a-3p	GABARAPL1
hsa-miR-203a-3p	GCLM
hsa-miR-203a-3p	GNPAT
hsa-miR-203a-3p	GSK3B
hsa-miR-203a-3p	GSR
hsa-miR-203a-3p	GSTM3
hsa-miR-203a-3p	GSTT1
hsa-miR-203a-3p	HDAC2
hsa-miR-203a-3p	HGF
hsa-miR-203a-3p	HOMER1
hsa-miR-203a-3p	ICAM1
hsa-miR-203a-3p	IGF1
hsa-miR-203a-3p	IGF1R
hsa-miR-203a-3p	IKBKB
hsa-miR-203a-3p	IL1A
hsa-miR-203a-3p	IL1RAP
hsa-miR-203a-3p	IL3
hsa-miR-203a-3p	IL6
hsa-miR-203a-3p	INSR
hsa-miR-203a-3p	IRS1
hsa-miR-203a-3p	IRS2
hsa-miR-203a-3p	ITPR1
hsa-miR-203a-3p	ITPR2
hsa-miR-203a-3p	JUN
hsa-miR-203a-3p	KITLG
hsa-miR-203a-3p	KL
hsa-miR-203a-3p	LAP3
hsa-miR-203a-3p	LHPP
hsa-miR-203a-3p	LMNB2
hsa-miR-203a-3p	MAD2L1
hsa-miR-203a-3p	MAP2K1
hsa-miR-203a-3p	MAP2K4
hsa-miR-203a-3p	MAP3K1
hsa-miR-203a-3p	MAP3K13
hsa-miR-203a-3p	MAP3K2
hsa-miR-203a-3p	MAP3K5
hsa-miR-203a-3p	MAP3K7
hsa-miR-203a-3p	MAP3K8
hsa-miR-203a-3p	MAP4K3
hsa-miR-203a-3p	MAPK1
hsa-miR-203a-3p	MAPK10
hsa-miR-203a-3p	MAPK8
hsa-miR-203a-3p	MAPK9
hsa-miR-203a-3p	MAPKAPK3
hsa-miR-203a-3p	MAX
hsa-miR-203a-3p	MEF2A
hsa-miR-203a-3p	MEF2C
hsa-miR-203a-3p	MET
hsa-miR-203a-3p	MYD88
hsa-miR-203a-3p	NAT8B
hsa-miR-203a-3p	NDUFA10
hsa-miR-203a-3p	NDUFA5
hsa-miR-203a-3p	NDUFA8
hsa-miR-203a-3p	NDUFA9
hsa-miR-203a-3p	NDUFB4
hsa-miR-203a-3p	NDUFS1
hsa-miR-203a-3p	NF1
hsa-miR-203a-3p	NFATC1
hsa-miR-203a-3p	NLK
hsa-miR-203a-3p	NPPC
hsa-miR-203a-3p	NRAS
hsa-miR-203a-3p	NTRK2
hsa-miR-203a-3p	ORC2
hsa-miR-203a-3p	ORC4
hsa-miR-203a-3p	PAK1
hsa-miR-203a-3p	PDGFD
hsa-miR-203a-3p	PDGFRA
hsa-miR-203a-3p	PECAM1
hsa-miR-203a-3p	PEX13
hsa-miR-203a-3p	PEX19
hsa-miR-203a-3p	PEX2
hsa-miR-203a-3p	PEX26
hsa-miR-203a-3p	PEX3
hsa-miR-203a-3p	PEX5L
hsa-miR-203a-3p	PIAS4
hsa-miR-203a-3p	PIK3CA
hsa-miR-203a-3p	PIK3CB
hsa-miR-203a-3p	PIK3CD
hsa-miR-203a-3p	PIK3R1
hsa-miR-203a-3p	PIK3R2
hsa-miR-203a-3p	PLA2G4A
hsa-miR-203a-3p	PLA2G4D
hsa-miR-203a-3p	PLA2G4E
hsa-miR-203a-3p	PLA2G4F
hsa-miR-203a-3p	PLK2
hsa-miR-203a-3p	PPA2
hsa-miR-203a-3p	PPARGC1A
hsa-miR-203a-3p	PPM1A
hsa-miR-203a-3p	PPM1B
hsa-miR-203a-3p	PPP3CB
hsa-miR-203a-3p	PRKAA2
hsa-miR-203a-3p	PRKAB1
hsa-miR-203a-3p	PRKAB2
hsa-miR-203a-3p	PRKACB
hsa-miR-203a-3p	PRKAG2
hsa-miR-203a-3p	PRKAG3
hsa-miR-203a-3p	PRKCA
hsa-miR-203a-3p	PRKCB
hsa-miR-203a-3p	PRKDC
hsa-miR-203a-3p	PTEN
hsa-miR-203a-3p	PXMP4
hsa-miR-203a-3p	RAG1
hsa-miR-203a-3p	RAP1A
hsa-miR-203a-3p	RASGRF1
hsa-miR-203a-3p	RASGRF2
hsa-miR-203a-3p	RASGRP3
hsa-miR-203a-3p	RB1
hsa-miR-203a-3p	RB1CC1
hsa-miR-203a-3p	RBL2
hsa-miR-203a-3p	RPS6KA2
hsa-miR-203a-3p	RPS6KA3
hsa-miR-203a-3p	RPS6KA5
hsa-miR-203a-3p	RPS6KA6
hsa-miR-203a-3p	RPS6KB1
hsa-miR-203a-3p	RRAS2
hsa-miR-203a-3p	RRM1
hsa-miR-203a-3p	RRM2B
hsa-miR-203a-3p	S1PR1
hsa-miR-203a-3p	SCP2
hsa-miR-203a-3p	SDC1
[truncated: 4,962 more rows]
